# Supplementary material for: SARS-CoV-2 antibody immunoassays in serial samples reveal earlier seroconversion in acutely ill COVID-19 patients developing ARDS
Source: medRxiv preprint, doi:10.1101/2021.02.15.21250916, version 2 (2021-02-23)
Supplement: S6 Fig [file 250916_file08.pdf]

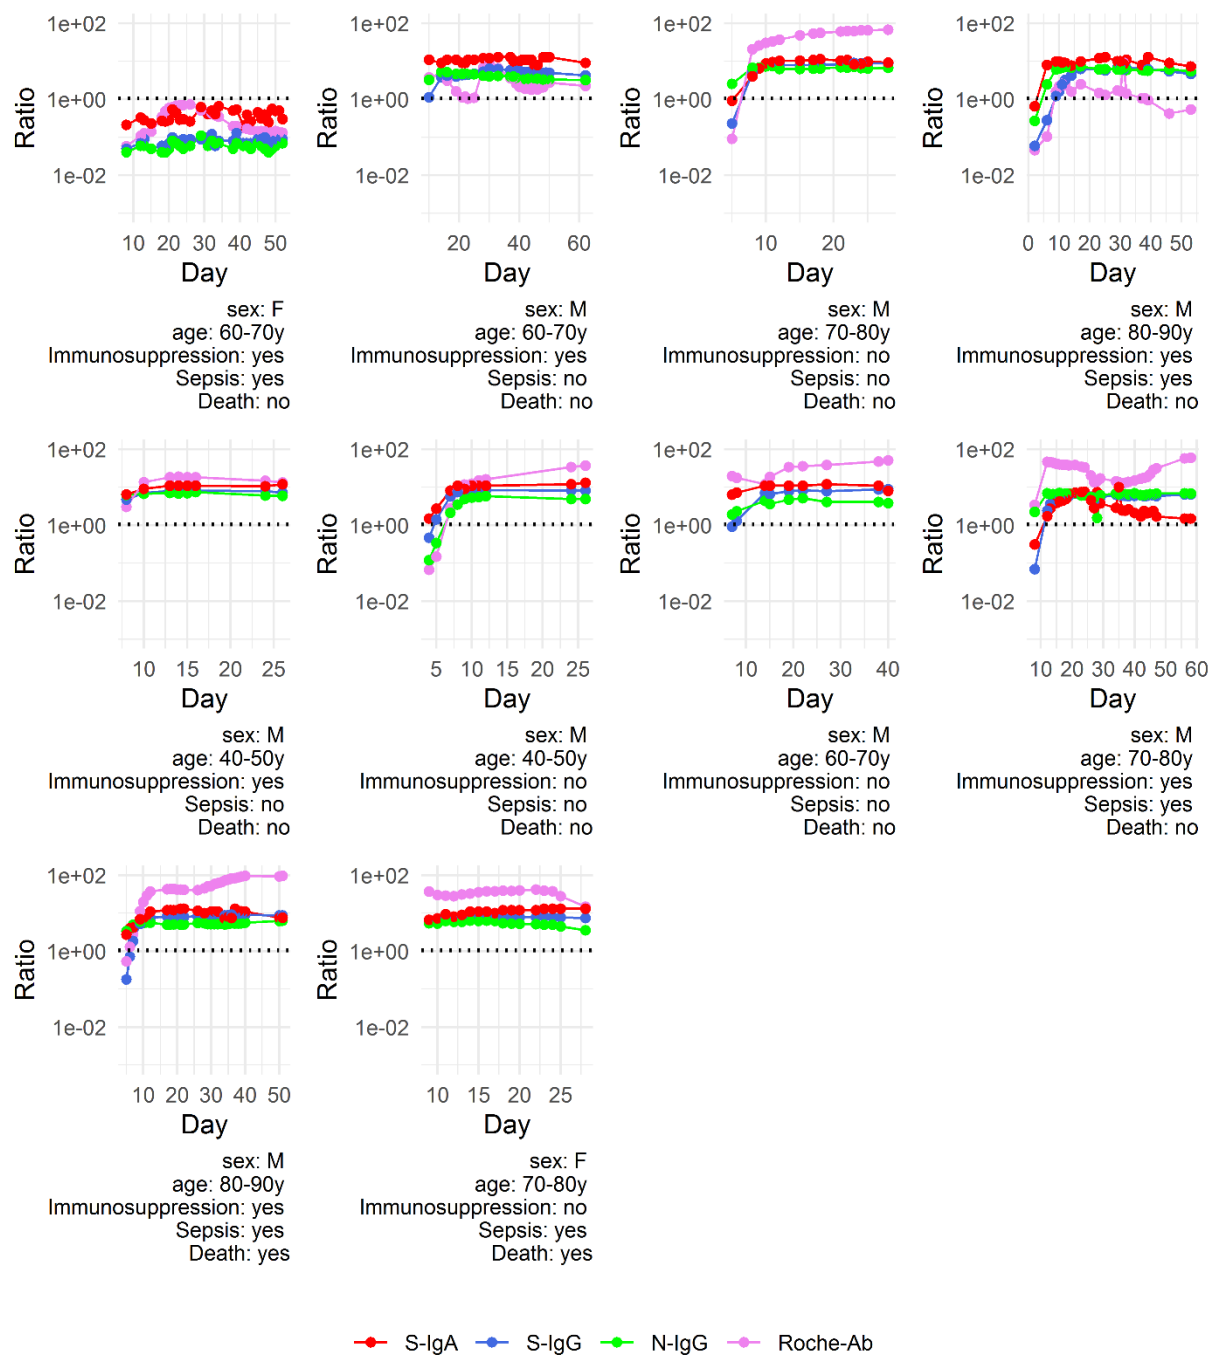

**S6 Fig. Individual results in the PCR-positive clinical cohort for the four different immunoassays in the ARDS group (first set).**
