# Supplementary material for: SARS-CoV-2 antibody immunoassays in serial samples reveal earlier seroconversion in acutely ill COVID-19 patients developing ARDS
Source: bioRxiv or medRxiv preprint supplement (doi:10.1101/2021.02.15.21250916), 2021-02-23
Supplement: Supplementary file [file media-1.pdf]

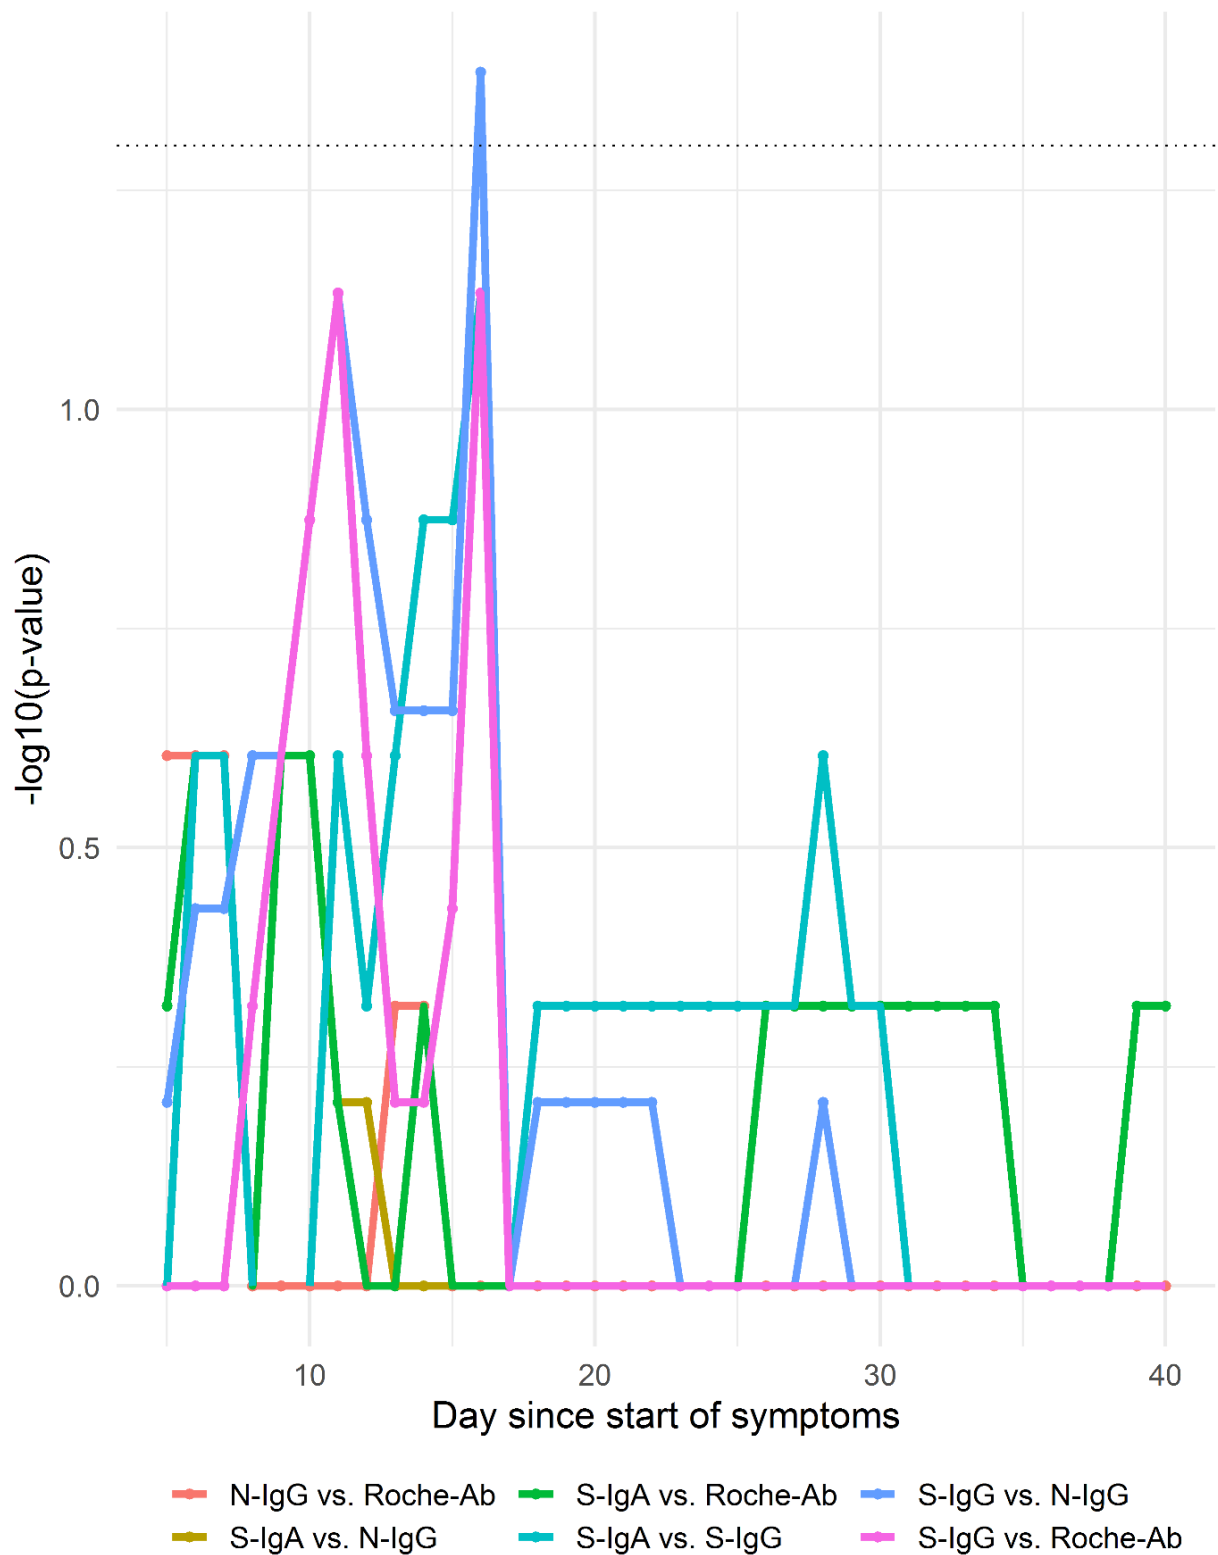

**S1 Fig. p-values for differences in qualitative test results for the four immunoassays in the PCR-positive clinical cohort.** The dotted line represents a p-value of 0.05.
