# Supplementary material for: SARS-CoV-2 antibody immunoassays in serial samples reveal earlier seroconversion in acutely ill COVID-19 patients developing ARDS
Source: bioRxiv or medRxiv preprint supplement (doi:10.1101/2021.02.15.21250916), 2021-02-23
Supplement: Supplementary file [file media-2.pdf]

**S1 Table. Sensitivities (with 95% confidence interval) of the different immunoassays grouped into time bins.**

| time period | n  | EUR S-IgA                | EUR S-IgG                | EUR N-IgG                | Roche-Ab                 |
|-------------|----|--------------------------|--------------------------|--------------------------|--------------------------|
| <5          | 10 | 10.0<br>(0.3% to 44.5%)  | 10.0<br>(0.3% to 44.5%)  | 20.0<br>(2.5% to 55.6%)  | 0.0<br>(0.0% to 30.8%)   |
| 5-9         | 24 | 50.0<br>(29.1% to 70.9%) | 50.0<br>(29.1% to 70.9%) | 62.5<br>(40.6% to 81.2%) | 62.5<br>(40.6% to 81.2%) |
| 10-14       | 28 | 78.6<br>(59.0% to 91.7%) | 64.3<br>(44.1% to 81.4%) | 78.6<br>(59.0% to 91.7%) | 71.4<br>(51.3% to 86.8%) |
| 15-19       | 26 | 88.5<br>(69.8% to 97.6%) | 80.8<br>(60.6% to 93.4%) | 88.5<br>(69.8% to 97.6%) | 84.6<br>(65.1% to 95.6%) |
| 20-29       | 28 | 96.4<br>(81.7% to 99.9%) | 89.3<br>(71.8% to 97.7%) | 96.4<br>(81.7% to 99.9%) | 92.9<br>(76.5% to 99.1%) |
| 30-39       | 13 | 92.3<br>(64.0% to 99.8%) | 92.3<br>(64.0% to 99.8%) | 92.3<br>(64.0% to 99.8%) | 92.3<br>(64.0% to 99.8%) |
| 40-49       | 9  | 88.9<br>(51.8% to 99.7%) | 88.9<br>(51.8% to 99.7%) | 88.9<br>(51.8% to 99.7%) | 77.8<br>(40.0% to 97.2%) |
| 50-64       | 8  | 87.5<br>(47.3% to 99.7%) | 87.5<br>(47.3% to 99.7%) | 75.0<br>(34.9% to 96.8%) | 62.5<br>(24.5% to 91.5%) |
