# Supplementary material for: SARS-CoV-2 antibody immunoassays in serial samples reveal earlier seroconversion in acutely ill COVID-19 patients developing ARDS
Source: bioRxiv or medRxiv preprint supplement (doi:10.1101/2021.02.15.21250916), 2021-02-23
Supplement: Supplementary file [file media-4.pdf]

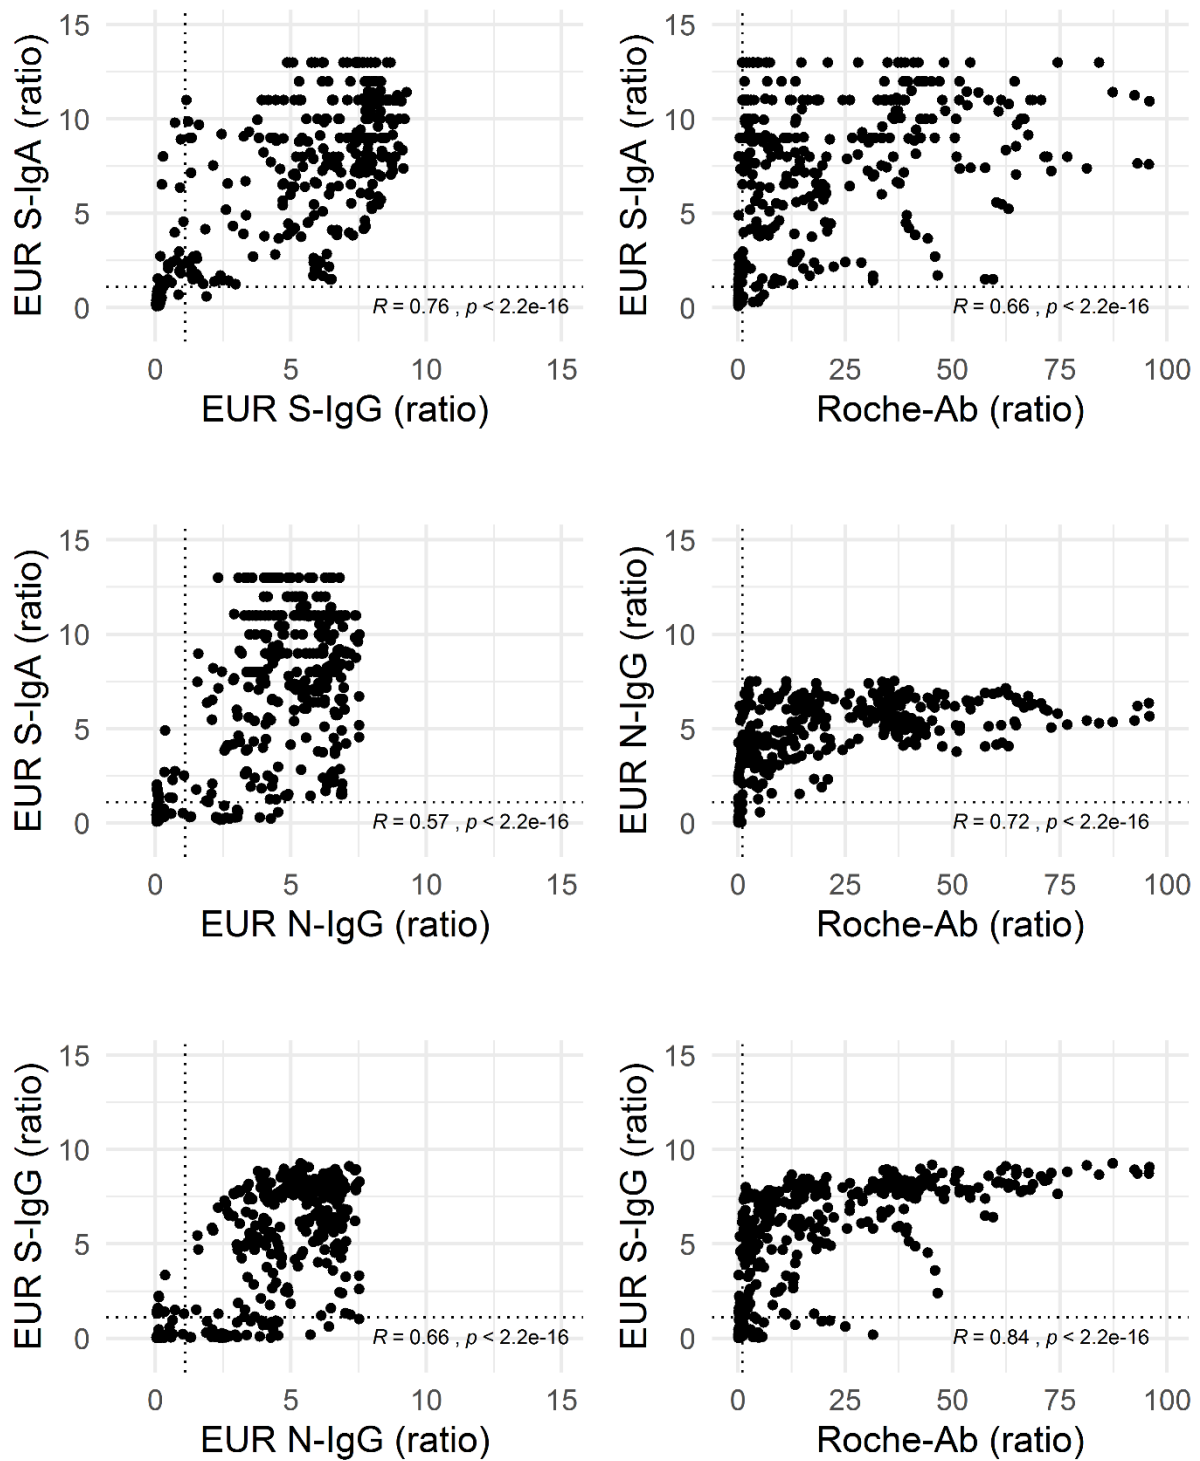

**S3 Fig. Pairwise comparison of signal ratios between the different immunoassays in the PCR-positive clinical cohort.** Spearman correlation coefficient (R) and p-values are shown. The dotted lines represent the cutoff values for a positive test result.
