# Supplementary material for: SARS-CoV-2 antibody immunoassays in serial samples reveal earlier seroconversion in acutely ill COVID-19 patients developing ARDS
Source: bioRxiv or medRxiv preprint supplement (doi:10.1101/2021.02.15.21250916), 2021-02-23
Supplement: Supplementary file [file media-4.pdf]

**S2 Table. Median age for true negative and false positive subjects in the negative cohorts.**

| assay     | test result | median age         | median age                   | median age | p-value |
|-----------|-------------|--------------------|------------------------------|------------|---------|
|           |             | pre-COVID19 cohort | PCR-negative clinical cohort | combined   |         |
| EUR S-IgA | neg.        | 27                 | 70                           | 49         | 0.0294  |
|           | pos.        | 28                 | 66                           | 30         |         |
| EUR S-IgG | neg.        | 27                 | 69                           | 48         | 0.7660  |
|           | pos.        | 41                 | 73                           | 53         |         |
| EUR N-IgG | neg.        | 27                 | 69                           | 47         | 0.0253  |
|           | pos.        | 31                 | 93                           | 89         |         |
| Roche-Ab  | neg.        | 27                 | 69                           | 48         | /       |
|           | pos.        | /                  | /                            | /          |         |
