# Supplementary material for: SARS-CoV-2 antibody immunoassays in serial samples reveal earlier seroconversion in acutely ill COVID-19 patients developing ARDS
Source: bioRxiv or medRxiv preprint supplement (doi:10.1101/2021.02.15.21250916), 2021-02-23
Supplement: Supplementary file [file media-13.pdf]

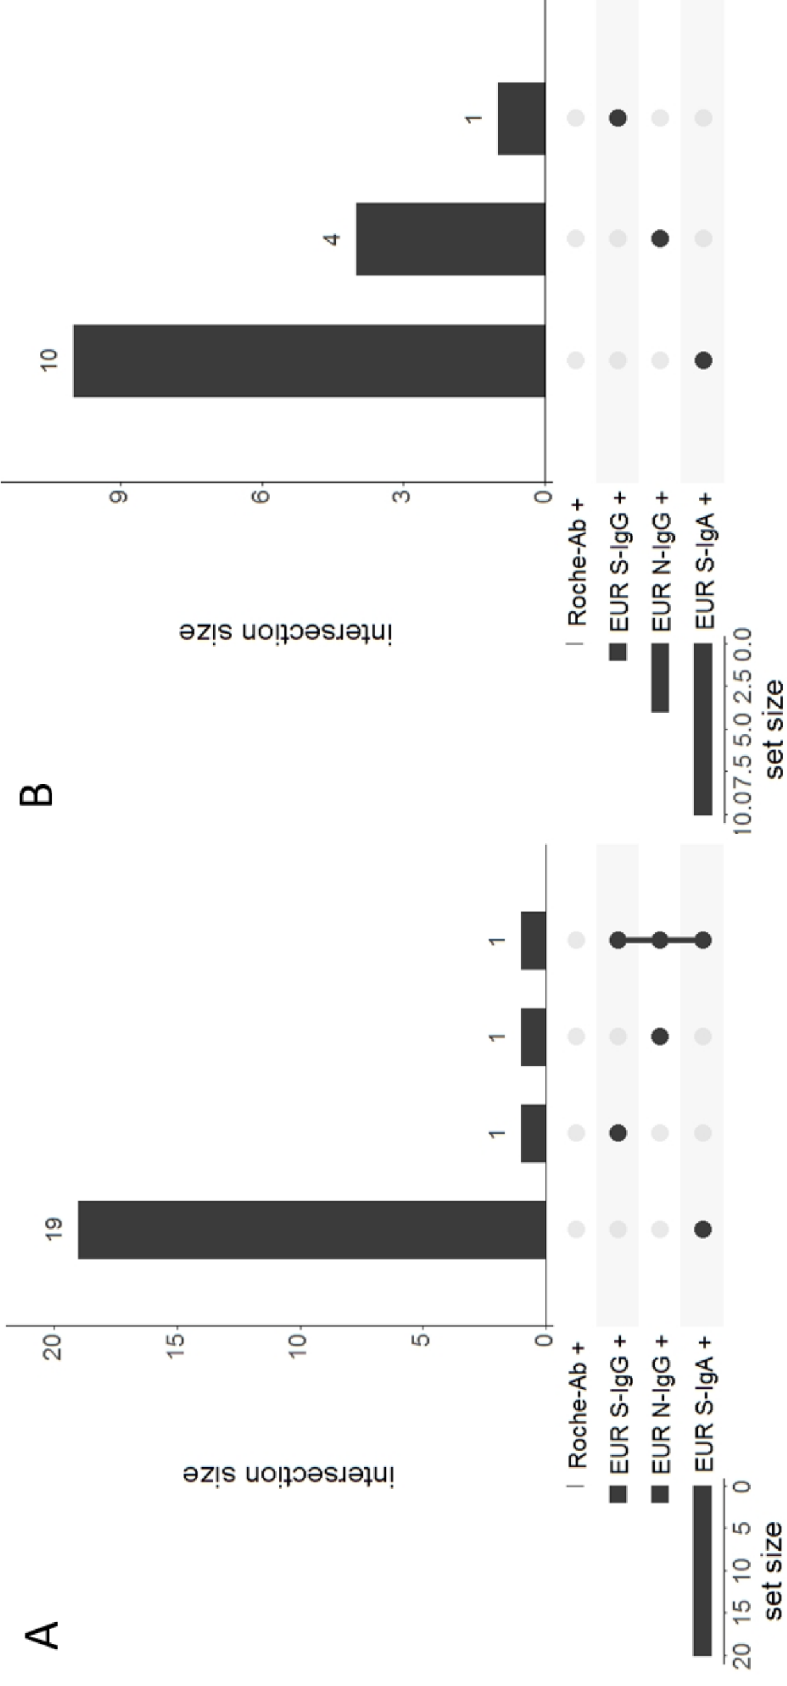

**S11 Fig.** Overlap of positive results between immunoassays in the two negative cohorts. (A) Pre-COVID-19 cohort. (B) PCR-negative clinical cohort.

(This plot was generated using the UpSetR R package) (1)

References

1. Jake R Conway, Alexander Lex, Nils Gehlenborg UpSetR: An R Package for the Visualization of Intersecting Sets and their Properties  
doi: <https://doi.org/10.1093/bioinformatics/btx364>
