# Supplementary material for: SARS-CoV-2 antibody immunoassays in serial samples reveal earlier seroconversion in acutely ill COVID-19 patients developing ARDS
Source: bioRxiv or medRxiv preprint supplement (doi:10.1101/2021.02.15.21250916), 2021-02-23
Supplement: Supplementary file [file media-14.pdf]

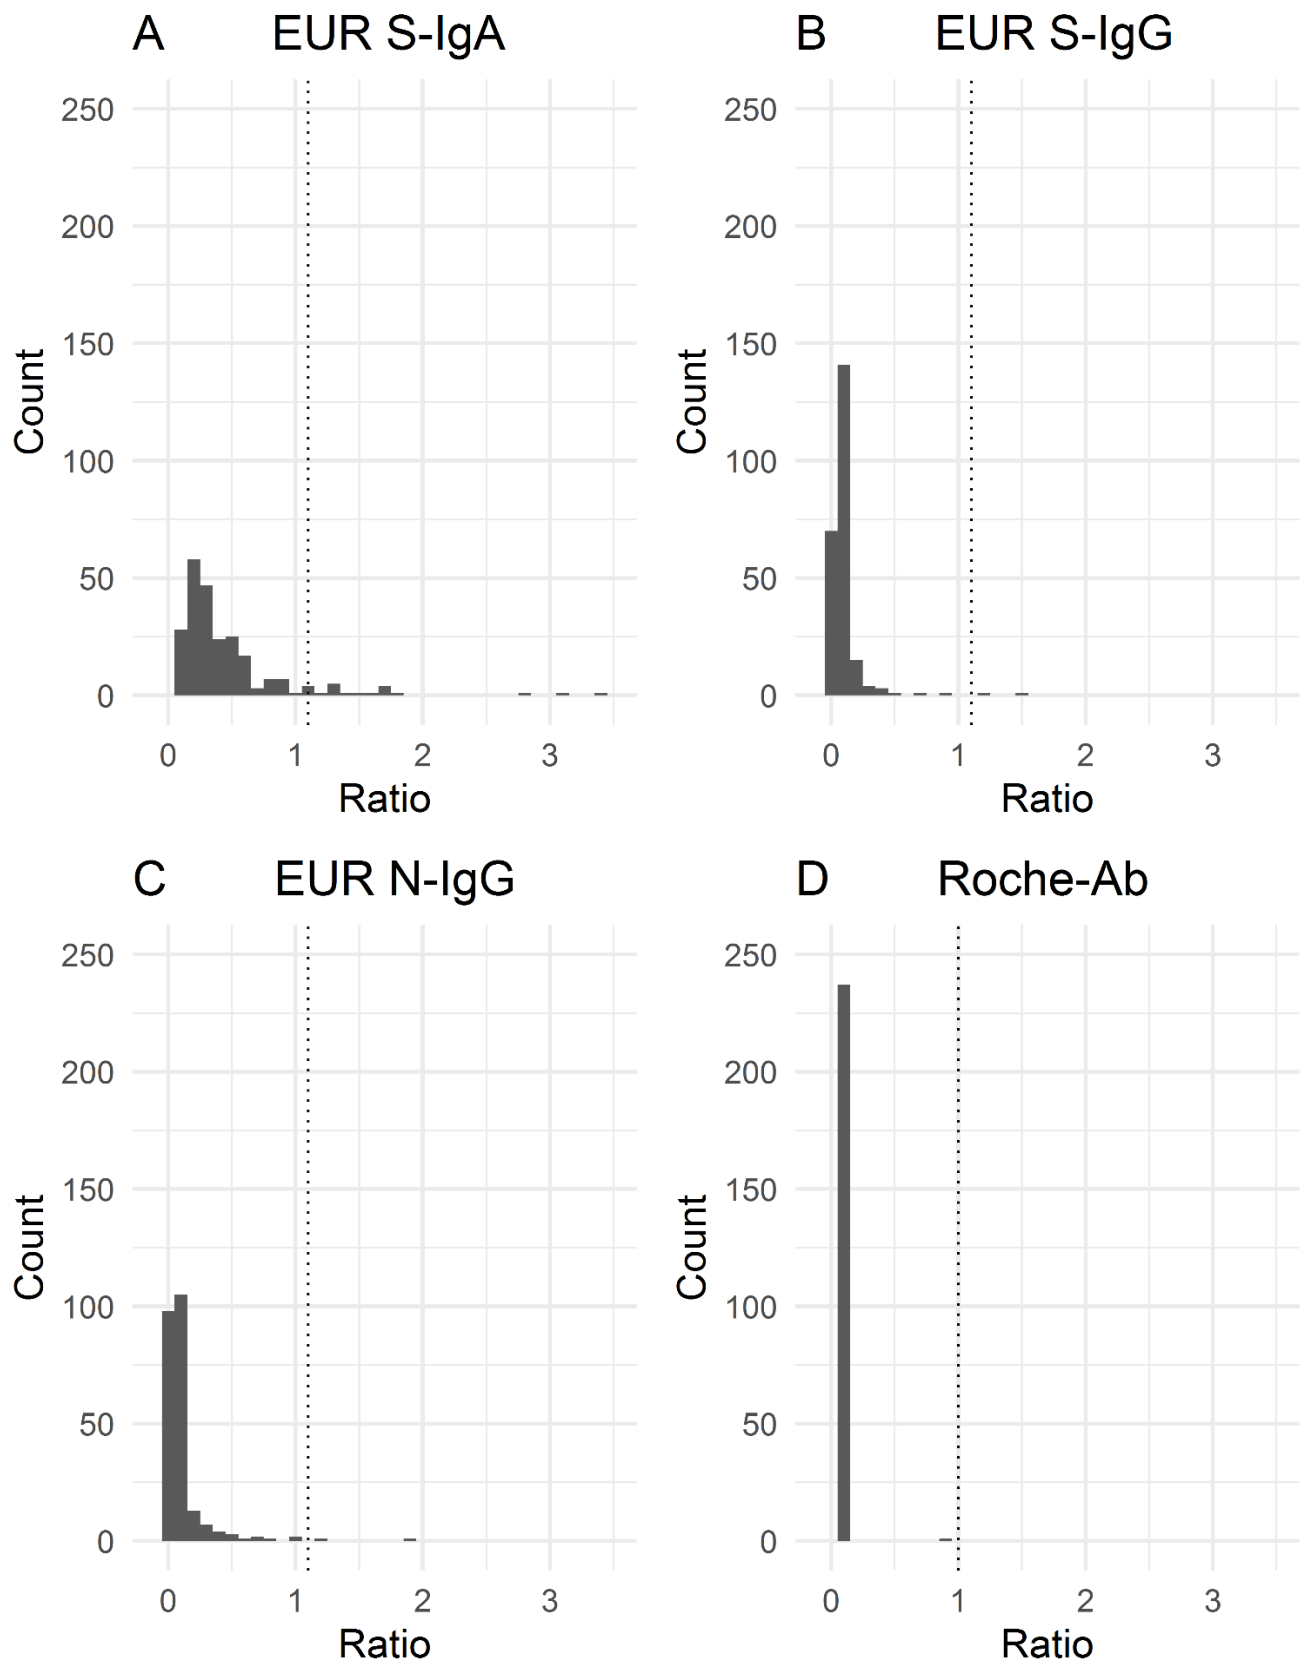

**S12 Fig. Distributions of signal ratios for the four different immunoassays in the pre-COVID-19 cohort.** The dotted lines represent the cutoff values for a positive test result. (A) EUR S-IgA. (B) EUR S-IgG. (C) EUR N-IgG. (D) Roche-Ab.
